# Supplementary material for: A novel method for the synthesis of well-crystallized β-AlF3 with high surface area derived from γ-Al2O3
Source: Royal Society of Chemistry journal article supplement (doi:10.1039/c1jm11630d), 2011-01-01
Supplement: c1jm11630d.pdf [file c1jm11630d.pdf]

## Supporting Information

### A novel method for the synthesis of well-crystallized $\beta$ -AlF<sub>3</sub> with high surface area derived from $\gamma$ -Al<sub>2</sub>O<sub>3</sub>

Wen-Zhi Jia, Ji-Qing Lu, Ping Chen, Yue-Juan Wang and Meng-Fei Luo\*

Zhejiang Key Laboratory for Reactive Chemistry on Solid Surfaces Institute of Physical Chemistry Zhejiang Normal University, 321004 Jinhua (China) E-mail: mengfeiluo@zjnu.cn Fax: (+86) 579-82282595

#### I. Experimental Details

##### 1. Materials synthesis

*HS- $\beta$ -AlF<sub>3</sub>*: The high surface area  $\beta$ -AlF<sub>3</sub> (HS- $\beta$ -AlF<sub>3</sub>) were prepared by a solid-template method and the detailed process is as follows. 5 g of  $\gamma$ -Al<sub>2</sub>O<sub>3</sub> (A.R., Sinopharm Chemical Reagent Co., 20-40 meshes) was mixed with 4.5 ml of 25 wt% sucrose aqueous solution by incipient-wetness impregnation for 1h and dried at 120 °C. The resulting solid was calcined for 3h at 400 °C under N<sub>2</sub> atmosphere. The above process was repeated for 3 times to obtain a carbon-filled  $\gamma$ -Al<sub>2</sub>O<sub>3</sub>. The resulting sample was denoted as C@Al<sub>2</sub>O<sub>3</sub>. The C@Al<sub>2</sub>O<sub>3</sub> was loaded in a fixed bed reactor and exposed in a gaseous HF flow (HF/N<sub>2</sub> = 4, total flow rate = 30 ml min<sup>-1</sup>) for 10 h at different temperatures. The resulting sample was denoted as C@AlF<sub>3</sub>. Finally, the C@AlF<sub>3</sub> was mixed with 4.8 ml 5 wt % KNO<sub>3</sub> aqueous solution and dried at 120 °C for 2h. Then the mixture was thermally treated in a tube furnace at 425 °C for 8 h in a oxygen flow (60 ml min<sup>-1</sup>) in order to remove the carbon. Finally, the obtained solid was washed with plenty of deionized water to remove K<sup>+</sup> ions, followed by dried at 120 °C for 8 h.

*Conventional  $\beta$ -AlF<sub>3</sub>*: conventional  $\beta$ -AlF<sub>3</sub> was prepared by thermal decomposition of  $\alpha$ -AlF<sub>3</sub>·3H<sub>2</sub>O according to the process reported in reference.<sup>S1</sup> 5 g of  $\alpha$ -AlF<sub>3</sub>·3H<sub>2</sub>O (A.R., Sinopharm Chemical Reagent Co.) was loaded in a tube furnace and heated at 400 °C for 2h.

*$\alpha$ -AlF<sub>3</sub>*:  $\alpha$ -AlF<sub>3</sub> was obtained by direct fluorination of Al<sub>2</sub>O<sub>3</sub> under HF atmosphere. 5 g of  $\gamma$ -Al<sub>2</sub>O<sub>3</sub> was loaded in a fix bed reactor and exposed in a gaseous HF flow (HF/N<sub>2</sub> = 4, total flow rate = 30 ml min<sup>-1</sup>) for 10 h at 250 °C. The resulting surface area of  $\alpha$ -AlF<sub>3</sub> is 15 m<sup>2</sup> g<sup>-1</sup>.

##### 2. Characterization

Surface areas of the samples were determined by the modified BET method from the N<sub>2</sub> sorption isotherms at 77 K on an Autosorb-1 apparatus. The samples were treated at 373 K for 4 h under vacuum before measurement.

X-ray diffraction patterns were collected on a PANalytical X'Pert PROMPD powder diffractometer operating at 40 kV and 40 mA using Cu-K $\alpha$  radiation, in the 2 $\theta$  range from 10 to 80° with a scan rate of 0.3° min<sup>-1</sup>. Phase

composition and cell parameter were calculated by the Rietveld method<sup>S2</sup> using MID-JADE 6.5 software. Raman spectra were collected on a Renishaw RM1000 confocal microscope with exciting wavelength of 514.5 nm under ambient conditions.

Scanning electron microscopy (SEM) image of the sample was obtained on a Hitachi S-4800 microscope equipped with an energy dispersion X-ray (EDX) attachment. High resolution transmission electron microscopy (HRTEM) of the sample was obtained on a JEOL JEM 2100F equipment with a field emissive gun, operating at 200 kV and with a point resolution of 0.24 nm.

TG-DSC experiment of the sample was performed using a Netzsch STA 449C instrument. The experiments were carried out to a maximum temperature of about 800 °C with a heating rate of 10 °C min<sup>-1</sup> in air (50 ml min<sup>-1</sup>). Ammonia temperature-programmed desorption (NH<sub>3</sub>-TPD) was conducted on a home-made apparatus. 100 mg of catalyst was loaded in a quartz tubular reactor (i. d. = 6 mm) and was heated from room temperature to 300 °C and kept for 30 min in a flow of Ar (30 ml min<sup>-1</sup>). Then it was cooled down to 50 °C. A flow of NH<sub>3</sub> (20 ml min<sup>-1</sup>) was then introduced for 10 min. The gaseous or physisorbed NH<sub>3</sub> was removed by purging Ar flow (30 ml min<sup>-1</sup>) at 80 °C for 1 h. Then the sample was heated to 700 °C with a ramp of 10 °C min<sup>-1</sup>. The desorbed NH<sub>3</sub> was monitored continuously via a TCD detector. The total amount of NH<sub>3</sub> desorbed was determined by a reaction with an excess of dilute HCl and back titration with NaOH solution. The mixture indicator contains a mixture of 0.1% brom-cresol green ethanol solution and 0.2% methyl red ethanol solution with a weight ratio of 3 : 1.

Fourier transformation Infrared (FTIR) spectra of pyridine adsorption on the catalysts were recorded on a Nicolet NEXUS 670 spectrometer in the range 1800–1400 cm<sup>-1</sup>. A self-supported pellet of catalyst was dried in a hot air oven for 1 h at 100 °C, then it was brought in contact with pyridine directly. The sample was kept in a hot air oven at 120 °C for 1 h to remove physisorbed pyridine. After cooling the sample to room temperature, the IR spectrum was recorded in the spectral range 1800–1400 cm<sup>-1</sup> with 64 scans and at a resolution of 4 cm<sup>-1</sup>.

## II. Supporting Tables and Figures.

Table S1 Physicochemical property for various forms of  $\text{AlF}_3$ .

| Sample                   | Structure type     | Structural features       | $S_{\text{BET}}$<br>( $\text{m}^2 \text{g}^{-1}$ ) | $n\text{NH}_3$<br>( $\mu\text{mol g}^{-1}$ ) | Ref.      |
|--------------------------|--------------------|---------------------------|----------------------------------------------------|----------------------------------------------|-----------|
| $\alpha\text{-AlF}_3$    | $\text{VF}_3$ (LT) | 3D network                | 3                                                  | –                                            | S3        |
| $\beta\text{-AlF}_3$     | HTB                | Hexagonal channels        | 31                                                 | 380                                          | S4        |
| HS- $\text{AlF}_3$       | Amorphous          | Mesoporous                | 200                                                | 900                                          | S5        |
| $\kappa\text{-AlF}_3$    | TTB                | Tetra/pentagonal channels | 19                                                 | –                                            | S6        |
| $\theta\text{-AlF}_3$    | Own type           | 3D network                | 64                                                 | 240                                          | S7        |
| $\eta\text{-AlF}_3$      | Pyrochlore         | Channels                  | 2                                                  | 160                                          | S7        |
| HS- $\beta\text{-AlF}_3$ | HTB                | Propous                   | 104                                                | 876                                          | This work |

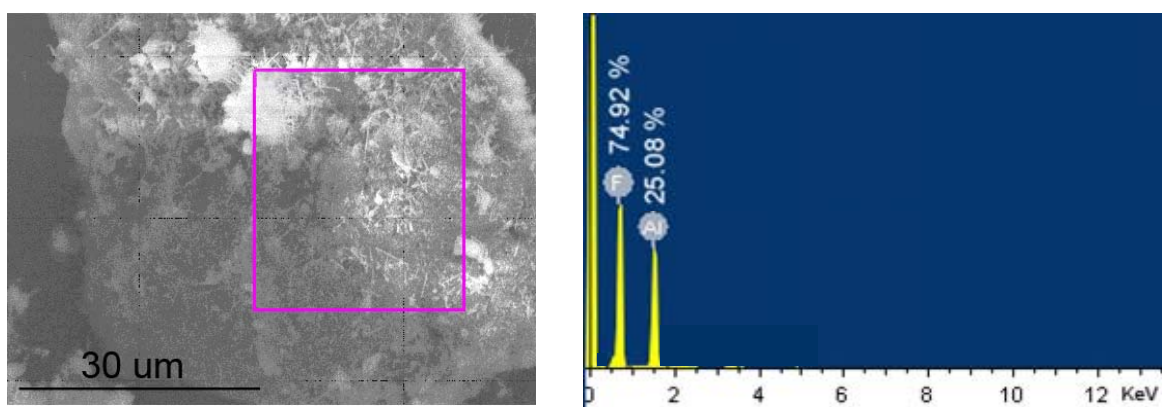

Figure S1 SEM image and EDX analysis for HS- $\beta\text{-AlF}_3$ .

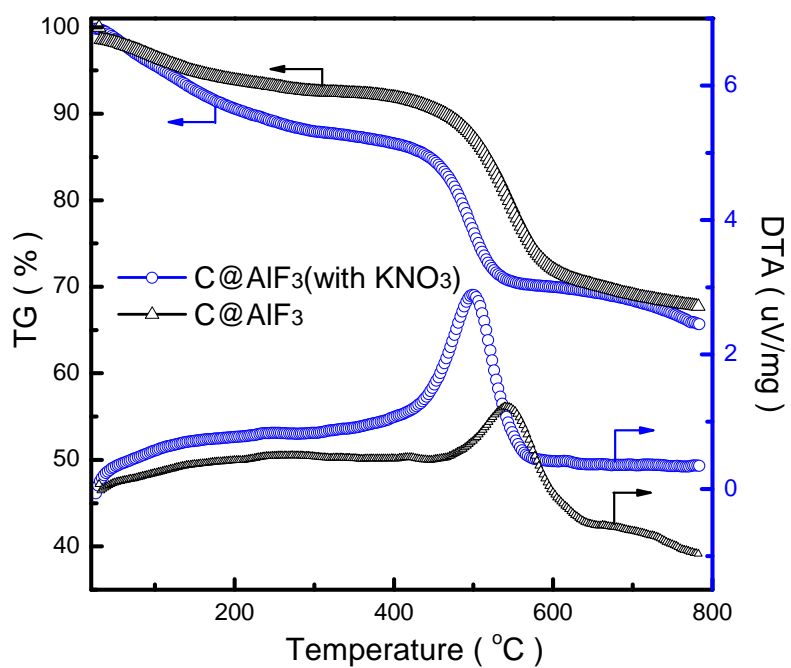

Figure S2 TG/DTA curves of C@AlF<sub>3</sub> with and without addition of KNO<sub>3</sub>.

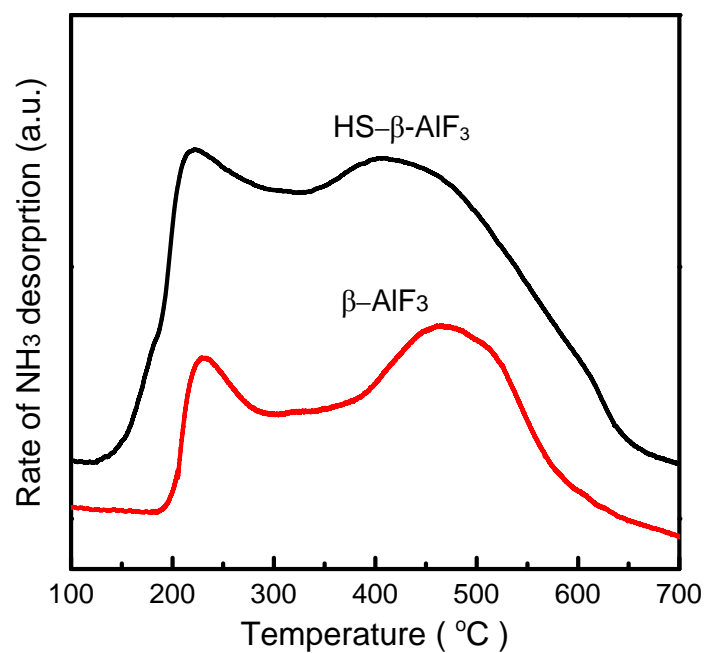

Figure S4 NH<sub>3</sub>-TPD profiles of β-AlF<sub>3</sub> samples.

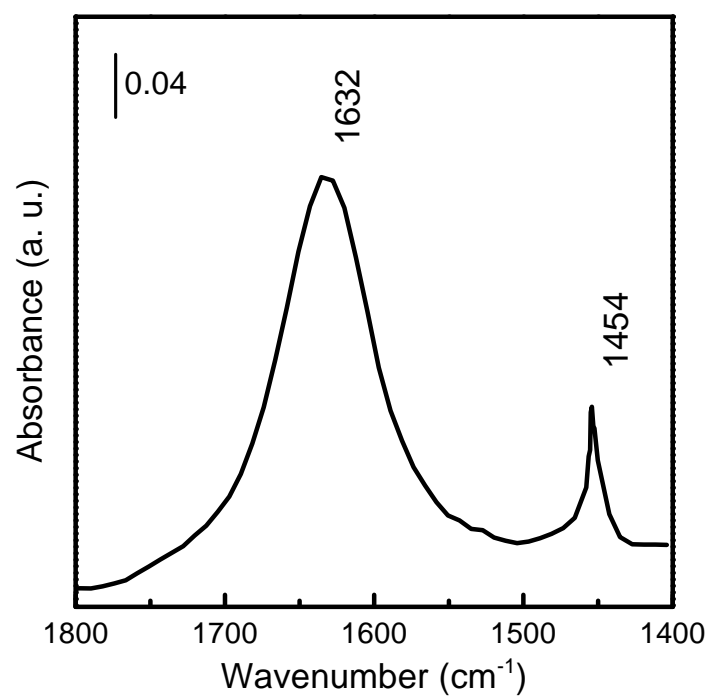

Figure S3 FTIR spectrum of pyridine adsorption on HS- $\beta$ -AlF<sub>3</sub>.

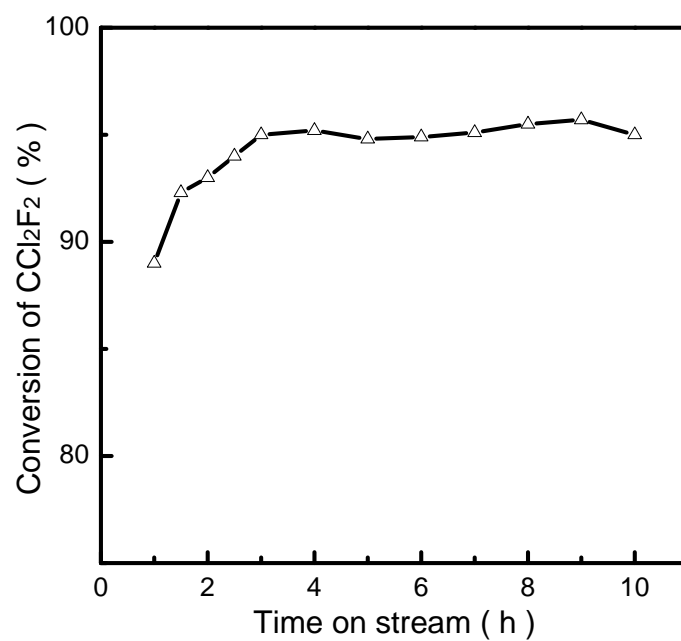

Figure S5 Dismutation of CCl<sub>2</sub>F<sub>2</sub> over HS- $\beta$ -AlF<sub>3</sub> at 300 °C.

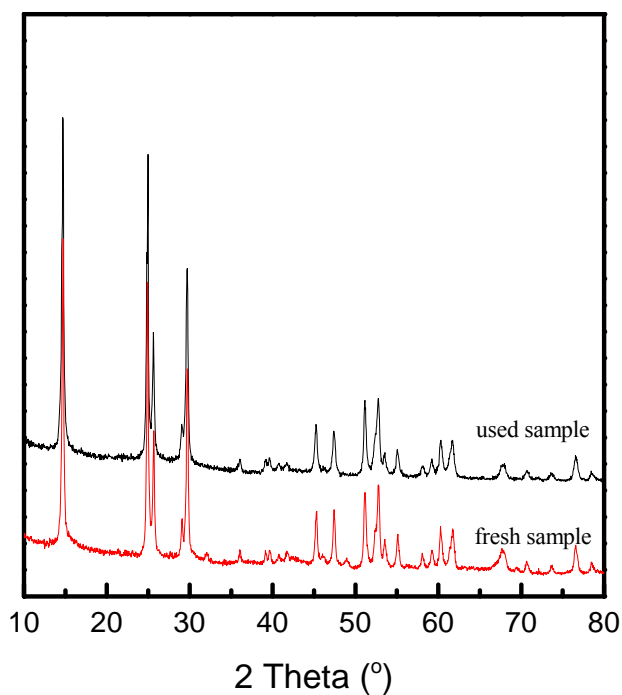

Figure S6 XRD patterns of fresh and used AlF<sub>3</sub> catalysts.

### III. References

- (S1) T. Krahl, R. Stösser, E. Kemnitz, G. Scholz, M. Feist, G. Silly, J. Y. Buzaré, *Inorg. Chem.*, 2003, **42**, 6474.
- (S2) R. A. Young, in *The Rietveld Method*, Oxford University Press, Oxford, 1993, pp. 22–23.
- (S3) J. Ravez, A. Mogus-Milankovic, J. P. Chaminade, P. Hagenmuller, *Mater. Res. Bull.*, 1984, **19**, 1311.
- (S4) L. Xu, Y. Q. Luo, Y. Li, L. B. Zhou, W. K. Gai, *Thermochim. Acta*, 2000, **352**, 47.
- (S5) St. Rüdiger, E. Kemnitz, *Dalton Trans.* 2008, 1117; E. Ünveren, E. Kemnitz, A. Lippitz, W. E. S. Unger, *J. Phys. Chem. B*, 2005, **109**, 1903.
- (S6) N. Herron, D. L. Thorn, R. L. Harlow, G. A. Jones, J. B. Parise, J. A. Fernandezbaca, T. Vogt, *Chem. Mater.* 1995, **7**, 75.
- (S7) L. Bail, J. L. Fourquet, U. Bentrup, *J. Solid State Chem.* 1992, **100**, 151.
